# Supplementary material for: Hematite Nanoparticles from Unexpected Reaction of Ferrihydrite with Concentrated Acids for Biomedical Applications
Source: MDPI journal article supplement (doi:10.3390/molecules25081984), 2020-04-23
Supplement: s1 [file s1]

Supplementary Materials

# Hematite Nanoparticles from Unexpected Reaction of Ferrihydrite with Concentrated Acids for Biomedical Applications

Afanasy V. Lunin <sup>1</sup>, Anna A. Lizunova <sup>1</sup>, Elizaveta N. Mochalova <sup>1,2</sup>, Maria N. Yakovtseva <sup>1</sup>, Vladimir R. Cherkasov <sup>1,2</sup>, Maxim P. Nikitin <sup>1,2,3</sup> and Eugene L. Kolychev <sup>1,2,\*</sup>

<sup>1</sup> Moscow Institute of Physics and Technology, 9 Institutskiy per., Dolgoprudny, Moscow Region, 141700, Russia; afanasy.lunin@phystech.edu (A.V.L.); anna.lizunova@gmail.com (A.A.L.); mochalova@phystech.edu (E.N.M.); mariantes@yandex.ru (M.N.Y.); v\_r\_cherkasov@list.ru (V.R.C.); max.nikitin@phystech.edu (M.P.N.)

<sup>2</sup> Prokhorov General Physics Institute of the Russian Academy of Sciences, 38 Vavilova St., Moscow, 119991, Russia

<sup>3</sup> Shemyakin–Ovchinnikov Institute of Bioorganic Chemistry, Russian Academy of Sciences, Miklukho-Maklaya St., 16/10, Moscow, 117997, Russia

\* Correspondence: kolychev.el@mipt.ru

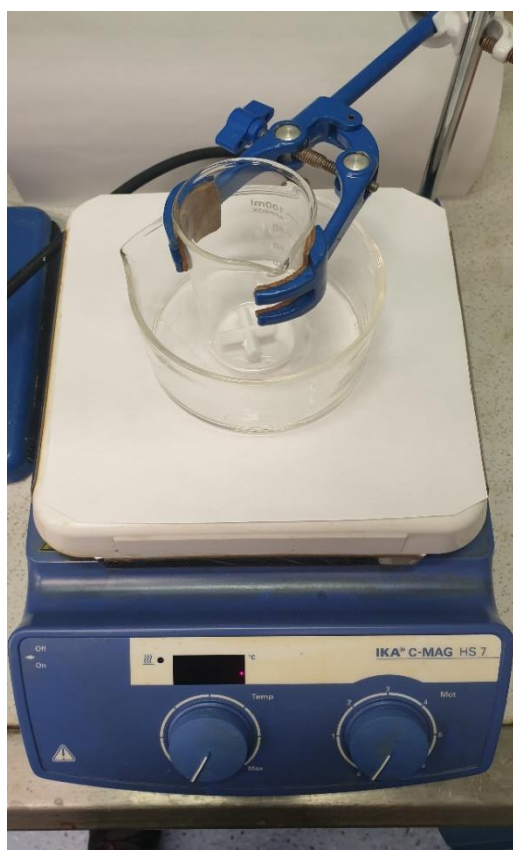

Figure S1. Experimental setup.

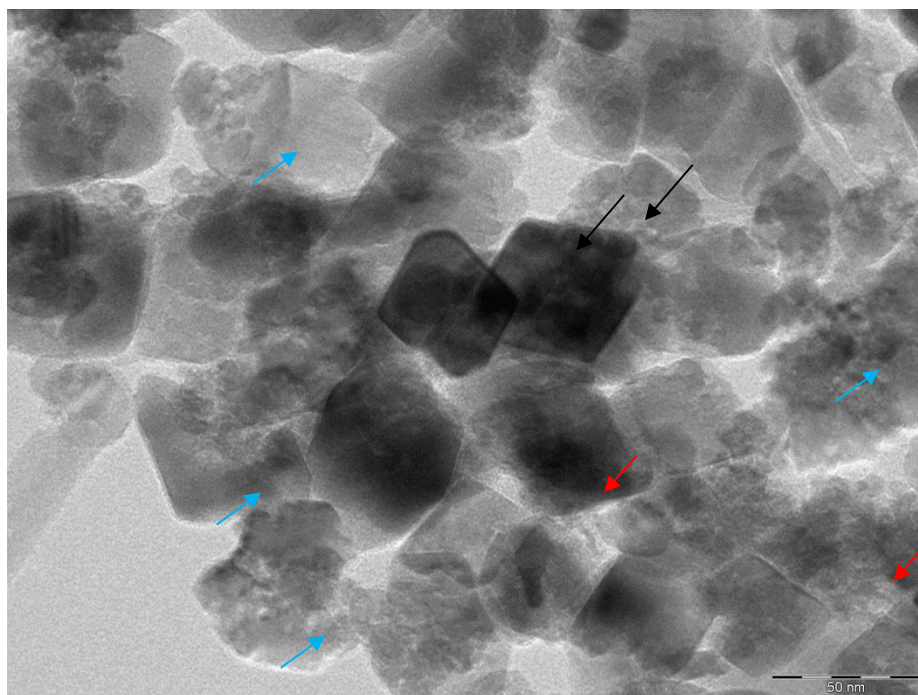

**Figure S2.** TEM images of nanoparticles with different shape and morphology: hexagonal bipyramid (black arrows) and rhombohedral shapes (red arrows), particles with full or partly irregular surface morphology (blue arrows).

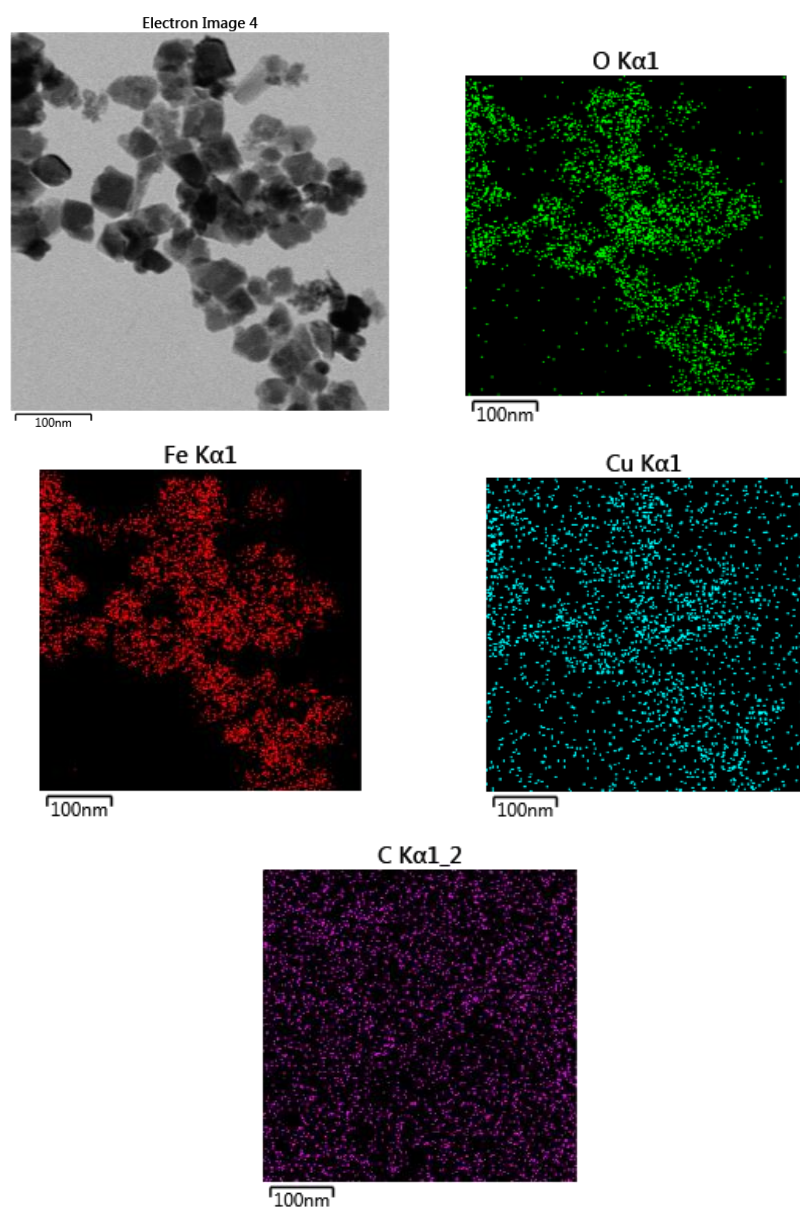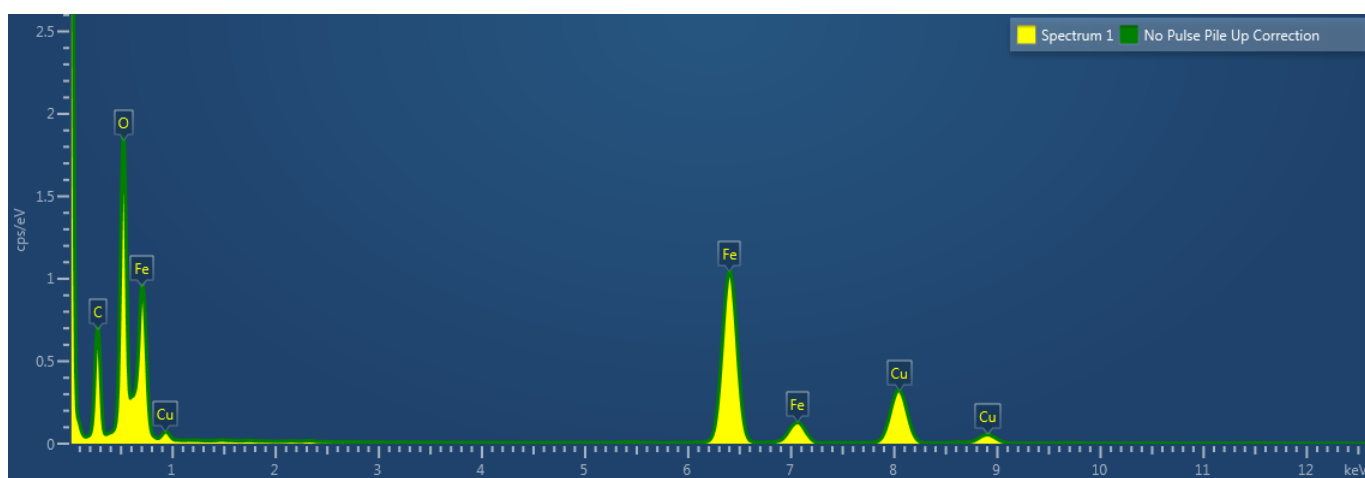

**Figure S3.** EDX analysis of the NPs. ~Distribution of the elements is shown by different colors: O – green, Fe – red, Cu – blue, C – purple (each insert is additionally signed on top). Peaks of carbon and copper are from the TEM grid.

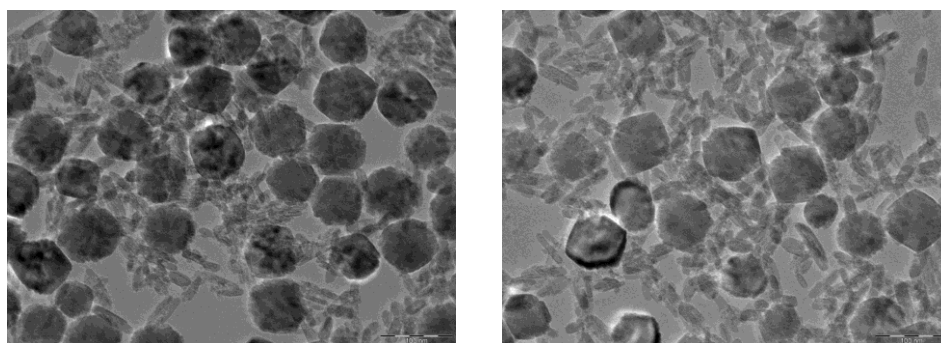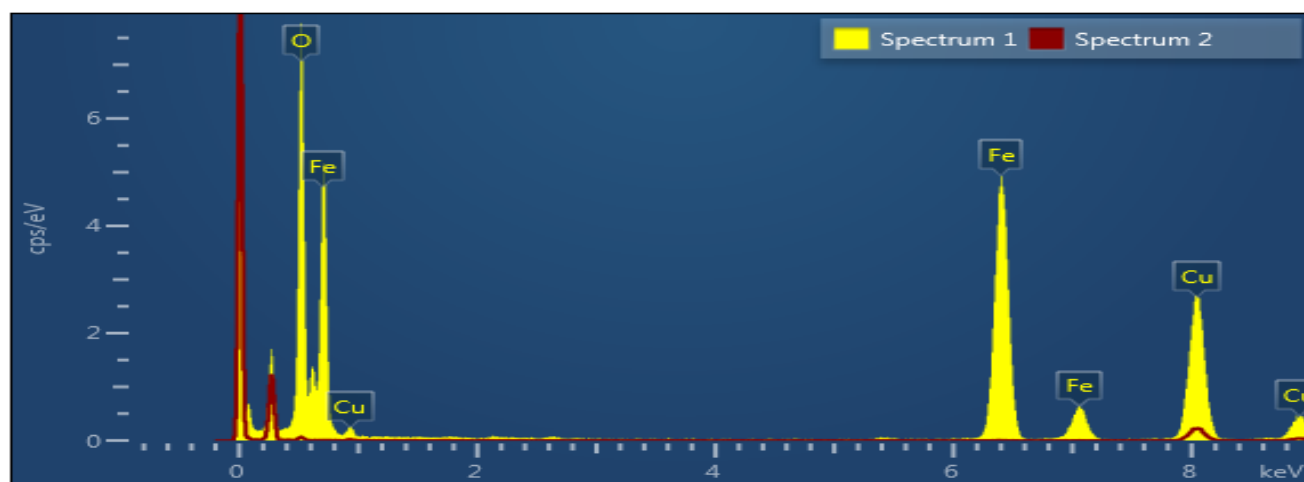

**Figure S4.** EDX analysis of hematite prepared by a well-established procedure.

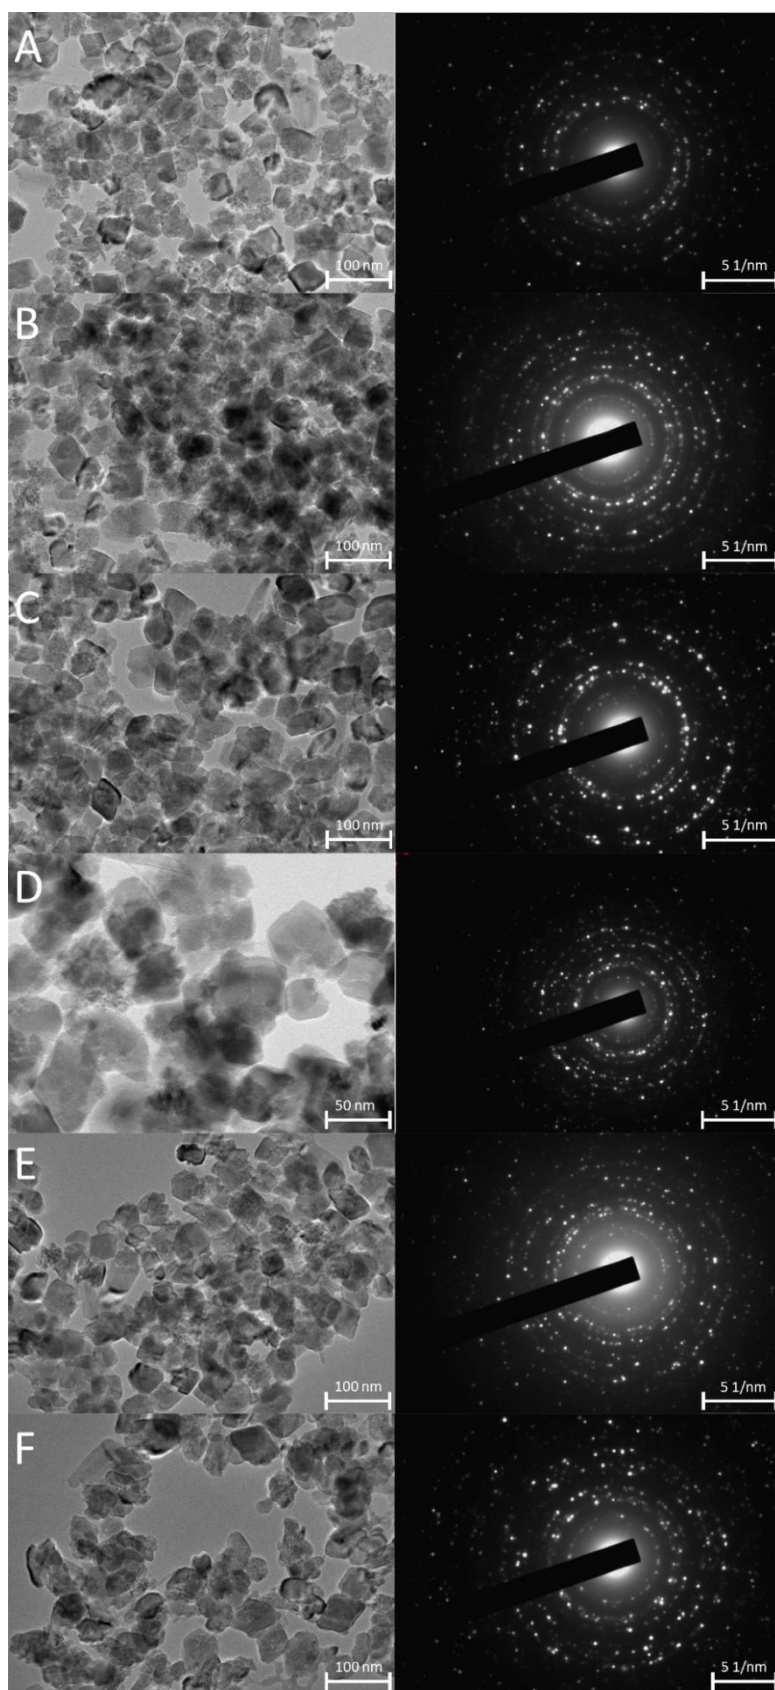

**Figure S5.** TEM and SAED images of nanoparticles fabricated using different concentrated acids: (a) Acetic acid; (b) Nitric acid; (c) Hydrochloric acid; (d) Sulfuric acid; (e) Phosphoric acid; (f) Sulfuric acid and phosphorus pentoxide.



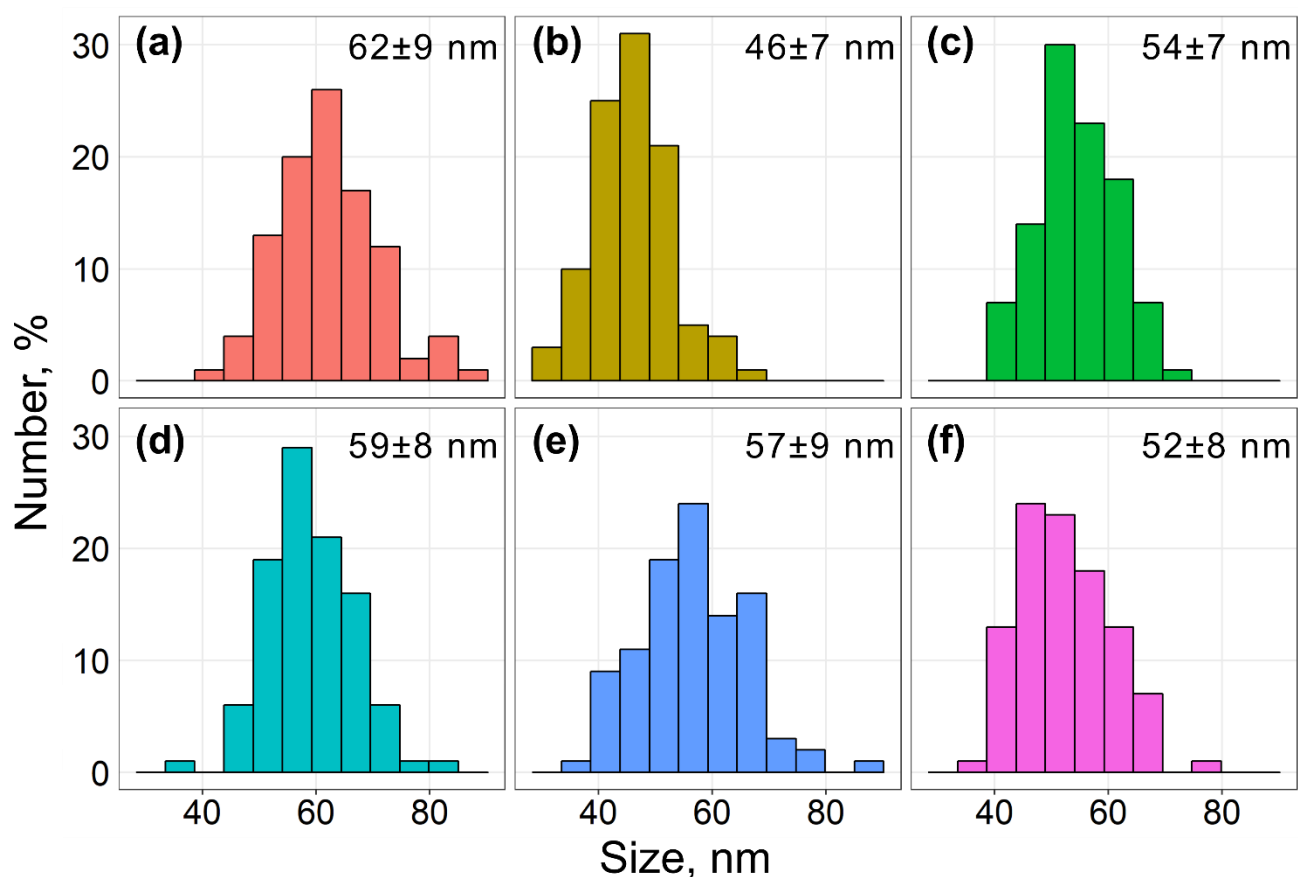

**Figure S6.** Size distribution of the NPs synthesized using different acids: (a) Sulfuric acid; (b) Nitric acid; (c) Acetic acid; (d) Phosphorus acid; (e) Hydrochloric acid; (f) Mixture of sulfuric acid and phosphorous pentoxide. The size was measured using SEM images; each NP's size was calculated as average of its maximum and minimum size. The values are presented as mean  $\pm$  standard deviation ( $n=100$ ). The images were processed using the Fiji/ImageJ software.

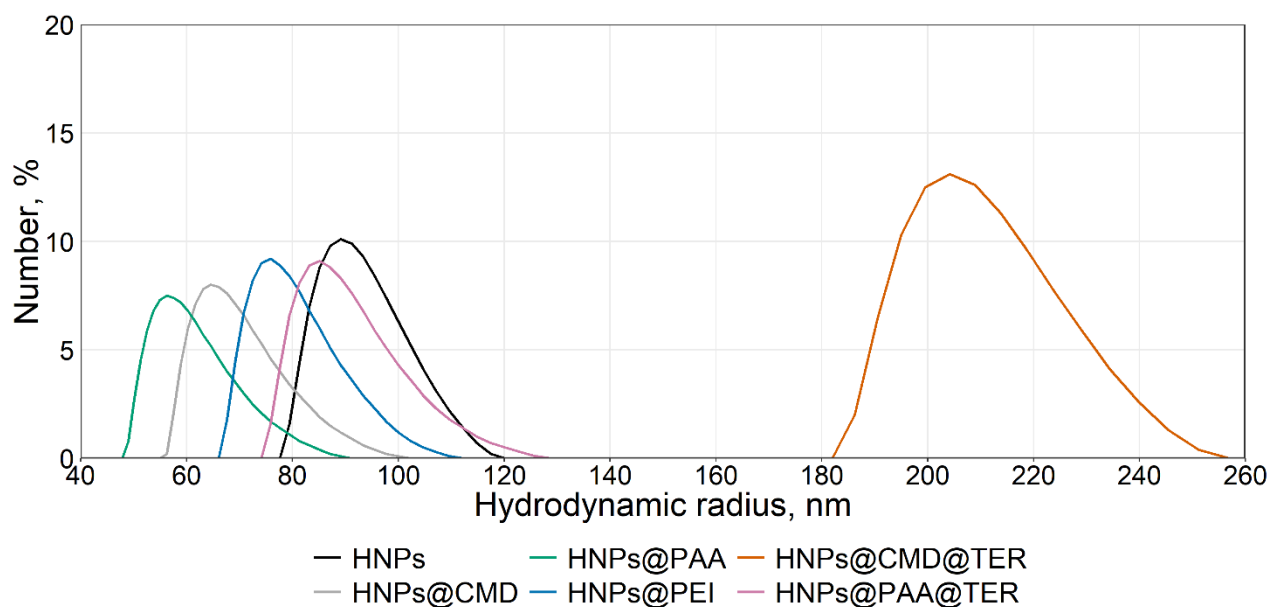

**Figure S7.** Hydrodynamic radii of synthesized nanoparticles according to DLS analysis.

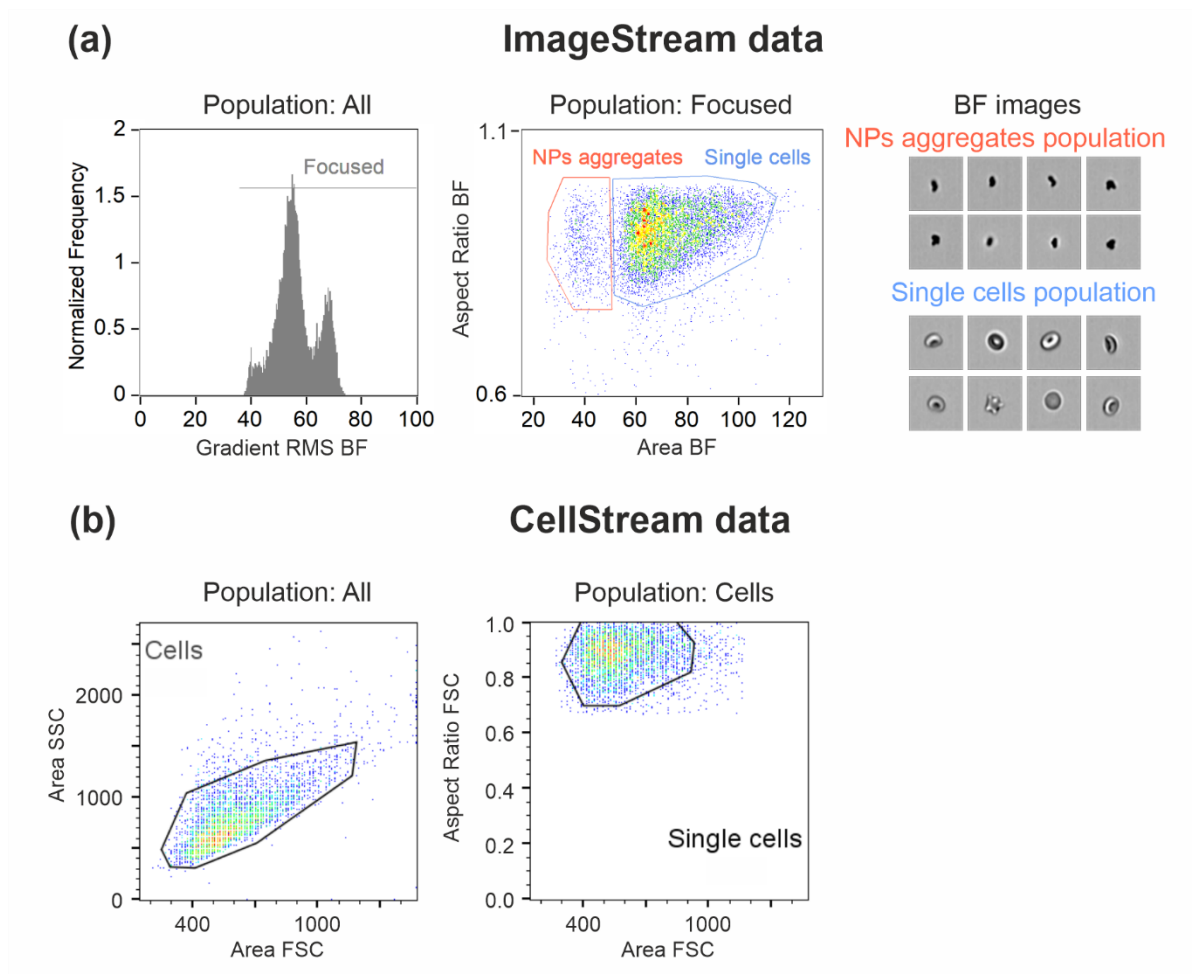

**Figure S8.** Gating strategy. **(a)** For the ImageStream flow cytometer experiments with erythrocyte targeting (an example is shown for the RBCs with HNPs@CMD@Control Ab); **(b)** For the CellStream flow cytometer experiments with BT-474 and CHO cell targeting (an example is shown for the BT-474 cells with HNPs@PAA@Trastuzumab-Cy3).
